# Supplementary material for: Fabrication of Graphitized Carbon Fibers from Fusible Lignin and Their Application in Supercapacitors
Source: MDPI journal article supplement (doi:10.3390/polym15081947), 2023-04-19
Supplement: s1 [file s1]

## Supplementary material

# Fabrication of Graphitized Carbon Fibers from Fusible Lignin and Their Application in Supercapacitors

Linfei Zhou <sup>1</sup>, Xiangyu You <sup>1,\*</sup>, Lingjie Wang <sup>1</sup>, Shijie Qi <sup>1</sup>, Ruichen Wang <sup>1</sup>, Yasumitsu Uraki <sup>2</sup> and Huijie Zhang <sup>1,\*</sup>

<sup>1</sup> College of Bioresources Chemical and Materials Engineering, Shaanxi University of Science & Technology, Xi'an 710021, China; linfeizhou@sust.edu.cn (L.Z.); 13177274057@163.com (L.W.); 210111015@sust.edu.cn (S.Q.); wang.ruichen@sust.edu.cn (R.W.)

<sup>2</sup> Research Faculty of Agriculture, Hokkaido University, Sapporo 060-8589, Japan; uraki@for.agr.hokudai.ac.jp

\* Correspondence: xyyou@sust.edu.cn (X.Y.); hjzhang@sust.edu.cn (H.Z.)

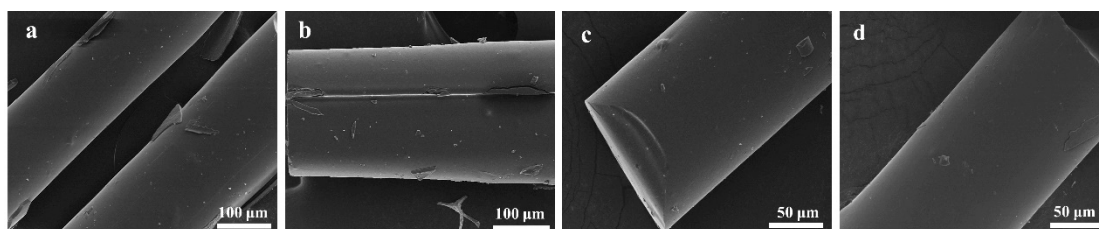

Figure S1. SEM images of LFs.

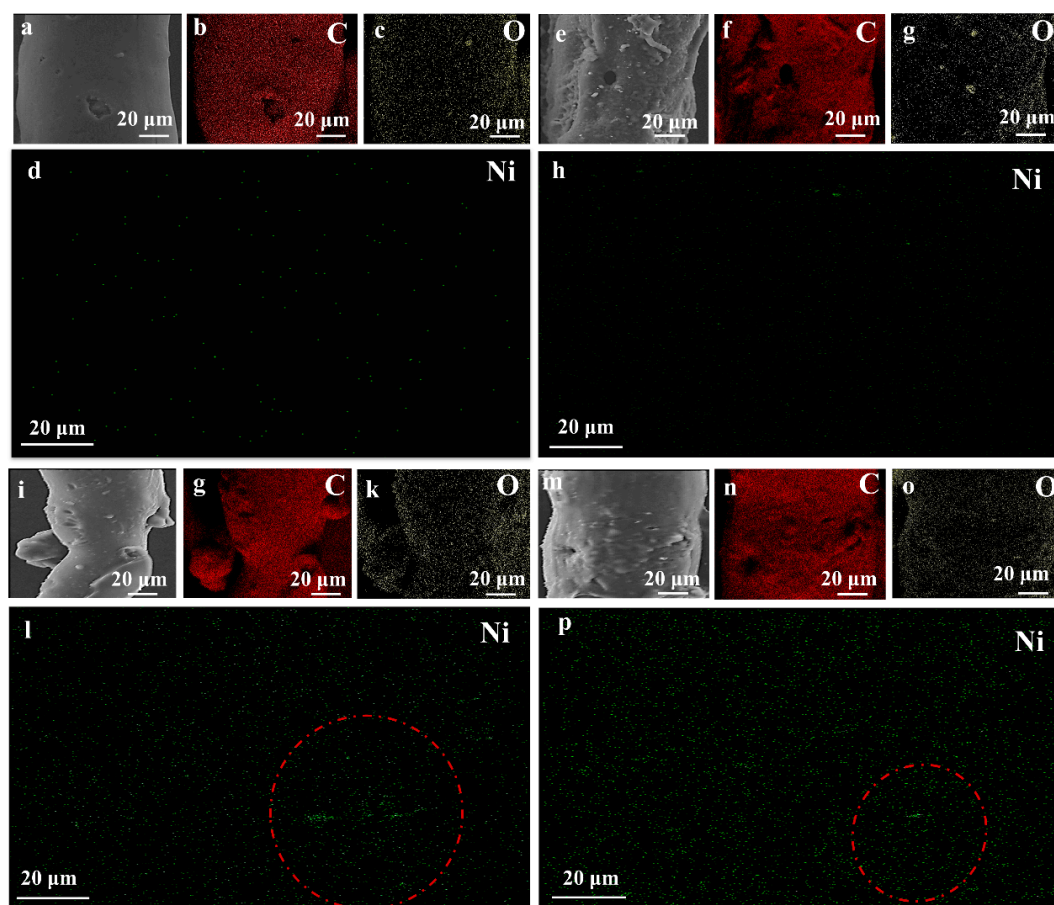

Figure S2. EDS mapping of LCFs, including SEM image of (a) LCF-0, (e) LCF-0.2, (i) LCF-0.4, and (m) LCF-0.6.

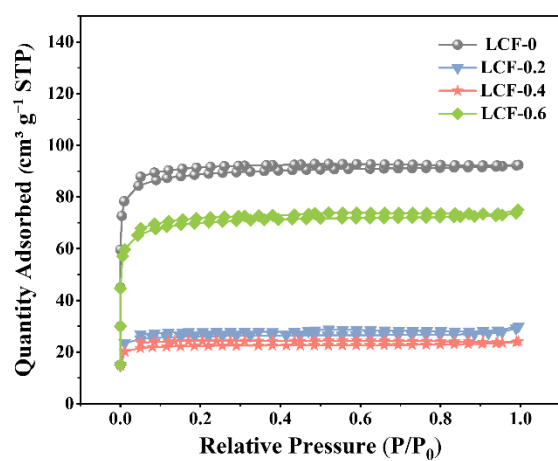

Figure S3.  $N_2$  adsorption/desorption isotherms.

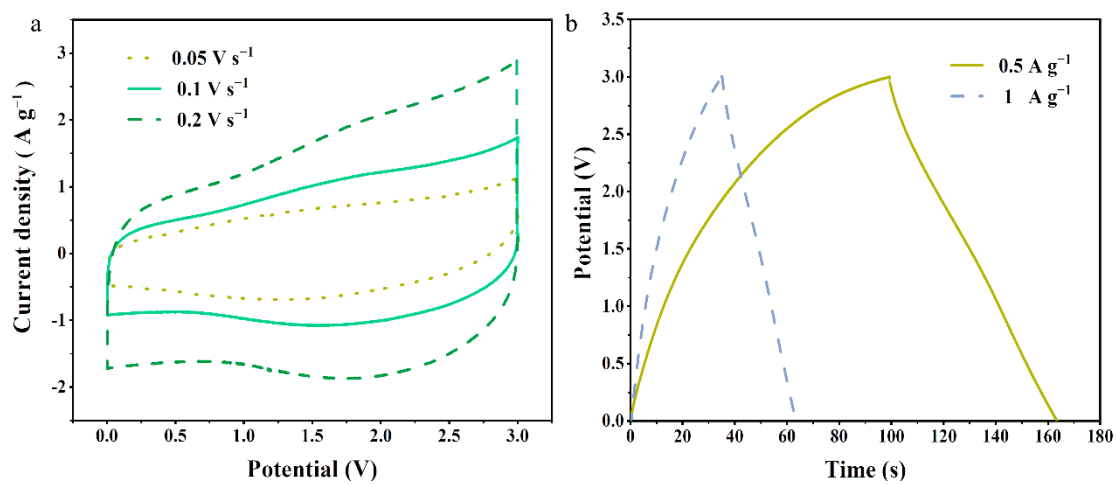

Figure S4. (a) CV for LCF-0.4 with different scan rate; (b) GCD curves for LCF-0.4 at different current density.
